# Supplementary material
Source: PubMed Central journal article supplement (PMC3035089)
Supplement: supp_138.5.839_DEV061804TableS1.pdf [file supp_138.5.839_DEV061804TableS1.pdf]

**Table S1. Primers used for plasmid constructions and real-time PCR**

| AT number | Sequence*                                        | Primers         |
|-----------|--------------------------------------------------|-----------------|
|           | 5'- <u>CTCGAG</u> CGTATTATACGGACGGTTTAAGCTAC-3'  | pGL2 F          |
|           | 5'-GGGGT <u>ACC</u> ACAAATCCTGTCCTAGCTAGCTTC-3'  | pGL2 R          |
|           | 5'- <u>CTCGAGA</u> ATTTTGAATCCATTCTCAAAGCTTTG-3' | pSCR F          |
|           | 5'- <u>GGTACCGG</u> AGATTGAAGGGTTGTTGGTCGTG-3'   | pSCR R          |
|           | 5'-GAAGCAGAGCGTGGGGTTTCTTCTAATAATTG-3'           | pSHR F          |
|           | 5'-TTTTTTTTTTAATGAATAAGAAAATGAATAG-3'            | pSHR R          |
|           | 5'-GTAGCTATTGGTGTCTACCAC-3'                      | pDWF4 F         |
|           | 5'-GGGGT <u>ACC</u> GGAGCTAGTTTCTCTCTCTC-3'      | pDWF4 R         |
|           | 5'-CC <u>CTGCAGA</u> AATGACAATTTAGTAC-3'         | pRCH1 F         |
|           | 5'-CC <u>GGTACC</u> GAGTTTTTTTC-3'               | pRCH1 R         |
| At5g15400 | 5'-TGCCTGCCAGATAATACACTATT-3'                    | U-box protein F |
|           | 5'-TGCTGCCAACATCAGTT-3'                          | U-box protein R |
| At3g14370 | 5'-TCCTCCGACGGAAACATCC-3'                        | WAG2 F          |
|           | 5'-GAGGAACACTCGGCCTAGGTT-3'                      | WAG2 R          |
| At3g30180 | 5'-AACCAGAGGTTGAAGATATAGAACAGA-3'                | BRox2 F         |
|           | 5'-AAATCCACTGCGTAATTCGTT-3'                      | BRox2 R         |
| At1g55610 | 5'-CGAAGGTGGAACAGACTGCAG-3'                      | BRL1 F          |
|           | 5'-GGTAGCCGCTCTAATCGTTCAG-3'                     | BRL1 R          |
| At3g13380 | 5'-TTCCTTACCACATATACATCGTTC-3'                   | BRL3 F          |
|           | 5'-AACCTATGCTCCATAACAACCA-3'                     | BRL3 R          |
| At1g73590 | 5'-TGGTCCCTCATTTCCCTCAAGT-3'                     | PIN1 F          |
|           | 5'-CAACCCAAGACTGAACATAGCCA-3'                    | PIN1 R          |
| At1g70940 | 5'-AGGCCGCATTACCTCAAGG-3'                        | PIN3 F          |
|           | 5'-TCGGAAGCGCTATAAGCATTG-3'                      | PIN3 R          |
| At1g23080 | 5'-TCAAGCTGCATTGCCTCAAG-3'                       | PIN7 F          |
|           | 5'-CCTGTACTCAAGATTGCGGGAT-3'                     | PIN7 R          |
| At5g62165 | 5'-AAGCGGAAGCTATTGGGACA-3'                       | AGL42 F         |
|           | 5'-CCTTTCCGAGACTCTTTGGAGTT-3'                    | AGL42 R         |
| At4g37490 | 5'-TCAATCATCGTCCCTGTACACG-3'                     | CYCB1;1 F       |
|           | 5'-TGC GTTTCTCTTGACTACAGGTTTT-3'                 | CYCB1;1 R       |
| At1g08560 | 5'-CAGATGGACGAGATCGAGCAT-3'                      | KNOLLE F        |
|           | 5'-CTTTGCAGTCTTCAGCTCATTAGC-3'                   | KNOLLE R        |
| At5g48940 | 5'-ATTAGGCGTGTGGCGGTTA-3'                        | RCH1 F          |
|           | 5'-GAAAAGGTGTGAATTGCCATGTC-3'                    | RCH1 R          |

\*Inserted restriction sites are underlined.
