# Supplementary material
Source: PubMed Central journal article supplement (PMC3035089)
Supplement: supp_138.5.839_DEV061804TableS2.pdf [file supp_138.5.839_DEV061804TableS2.pdf]

**Table S2. Results of t-test, two-tailed, assuming unequal variances**

| Figure | x-axis variables | Number of plants tested   | t-test                    |
|--------|------------------|---------------------------|---------------------------|
| 1B     | 2 DAG            | Col-0=20/ <i>bri1</i> =7  | 0.0017535                 |
|        | 3 DAG            |                           | 5.235E-09                 |
|        | 4 DAG            |                           | 4.078E-09                 |
|        | 5 DAG            |                           | 1.024E-11                 |
|        | 6 DAG            |                           | 7.764E-10                 |
|        | 7 DAG            |                           | 4.016E-08                 |
|        | 1C               |                           | 2 DAG                     |
| 3 DAG  |                  | 2.502E-06                 |                           |
| 4 DAG  |                  | 3.564E-06                 |                           |
| 5 DAG  |                  | 1.668E-07                 |                           |
| 6 DAG  |                  | 1.903E-05                 |                           |
| 7 DAG  |                  | 0.0001506                 |                           |
| 1E     |                  |                           | Col-0=24/ <i>bri1</i> =20 |
| 2A     | Meristem         | Col-0=60/ <i>bri1</i> =25 | 4.855E-07                 |
|        | Apical meristem  |                           | 0.0029434                 |
|        | Basal meristem   |                           | 6.982E-11                 |
| 2B     | Meristem         | Col-0=60/ <i>bri1</i> =25 | 4.392E-24                 |
|        | Apical meristem  |                           | 5.421E-13                 |
|        | Basal meristem   |                           | 1.183E-23                 |
| 2C     | Apical meristem  | Col-0=60/ <i>bri1</i> =25 | 2.039E-10                 |
|        | Basal meristem   |                           | 3.33E-14                  |
| 3C     |                  | Col-0=26/ <i>bri1</i> =10 | 4.176E-05                 |
|        |                  | Col-0=20/ <i>BRZ</i> =18  | 1.049E-05                 |

DAG, days after germination.
