# Supplementary material
Source: PubMed Central journal article supplement (PMC3035089)
Supplement: supp_138.5.839_DEV061804TableS3.pdf [file supp_138.5.839_DEV061804TableS3.pdf]

**Table S3. Results of t-test, two-tails, assuming unequal variances**

| Figure                        | x-axis variables             | Number of plants tested | DAG      | s.e.m.   | t-test   |
|-------------------------------|------------------------------|-------------------------|----------|----------|----------|
| 4B                            | Col-0                        | 36                      | 7        | 0.438984 |          |
|                               |                              |                         | 6        | 0.332321 |          |
|                               |                              |                         | 5        | 0.249463 |          |
|                               |                              |                         | 4        | 0.222242 |          |
|                               |                              |                         | 3        | 0.153572 |          |
|                               |                              |                         | 2        | 0.067727 |          |
|                               | <i>bri1</i>                  | 17                      | 7        | 0.307508 | 4.24E-32 |
|                               |                              |                         | 6        | 0.270857 | 2.88E-31 |
|                               |                              |                         | 5        | 0.187355 | 3.62E-33 |
|                               |                              |                         | 4        | 0.111333 | 1.54E-29 |
|                               |                              |                         | 3        | 0.06366  | 1.34E-24 |
|                               |                              |                         | 2        | 0.024502 | 4.31E-23 |
|                               | <i>pBRI1-BRI1-GFPox</i>      | 29                      | 7        | 0.861004 | 0.17236  |
|                               |                              |                         | 6        | 0.633274 | 0.133855 |
|                               |                              |                         | 5        | 0.408675 | 0.072267 |
|                               |                              |                         | 4        | 0.331485 | 0.368105 |
|                               |                              |                         | 3        | 0.206744 | 0.547385 |
|                               |                              |                         | 2        | 0.060646 | 6.46E-07 |
|                               | <i>bri1;pRCH1-BRI1-GFP</i>   | 15                      | 7        | 0.692393 | 2.61E-05 |
|                               |                              |                         | 6        | 0.559662 | 1.36E-05 |
|                               |                              |                         | 5        | 0.374174 | 3.78E-07 |
|                               |                              |                         | 4        | 0.257299 | 9.46E-10 |
|                               |                              |                         | 3        | 0.211208 | 6.01E-08 |
|                               |                              |                         | 2        | 0.094493 | 3.46E-07 |
|                               | <i>bri1;pGL2-BRI1-GFP 17</i> | 18                      | 7        | 0.490036 | 0.011961 |
|                               |                              |                         | 6        | 0.401513 | 0.004804 |
|                               |                              |                         | 5        | 0.366896 | 0.000585 |
|                               |                              |                         | 4        | 0.258642 | 0.000166 |
|                               |                              |                         | 3        | 0.138172 | 0.000396 |
|                               |                              |                         | 2        | 0.069696 | 3.91E-07 |
|                               | <i>bri1;pGL2-BRI1-GFP 18</i> | 15                      | 7        | 0.687939 | 0.820054 |
|                               |                              |                         | 6        | 0.48768  | 0.845934 |
|                               |                              |                         | 5        | 0.4311   | 0.497419 |
|                               |                              |                         | 4        | 0.327084 | 0.246343 |
|                               |                              |                         | 3        | 0.217651 | 0.018602 |
|                               |                              |                         | 2        | 0.073512 | 5.77E-07 |
| <i>bri1;pSCR-BRI1-GFP 32</i>  | 24                           | 7                       | 0.783854 | 3.75E-11 |          |
|                               |                              | 6                       | 0.609589 | 6.26E-12 |          |
|                               |                              | 5                       | 0.437592 | 6.82E-13 |          |
|                               |                              | 4                       | 0.2591   | 1.23E-16 |          |
|                               |                              | 3                       | 0.104613 | 9.65E-19 |          |
|                               |                              | 2                       | 0.06745  | 8.88E-15 |          |
| <i>bri1;pSCR-BRI1-GFP 33</i>  | 21                           | 7                       | 0.493704 | 3.78E-22 |          |
|                               |                              | 6                       | 0.346962 | 3.45E-24 |          |
|                               |                              | 5                       | 0.251465 | 1.08E-24 |          |
|                               |                              | 4                       | 0.175162 | 3.13E-23 |          |
|                               |                              | 3                       | 0.100732 | 5.62E-20 |          |
|                               |                              | 2                       | 0.064911 | 1.26E-13 |          |
| <i>bri1;pSHR-BRI1-GFP 123</i> | 25                           | 7                       | 0.570302 | 1.4E-14  |          |
|                               |                              | 6                       | 0.494964 | 8.27E-13 |          |
|                               |                              | 5                       | 0.377141 | 2.26E-12 |          |
|                               |                              | 4                       | 0.286511 | 4.37E-11 |          |
|                               |                              | 3                       | 0.148786 | 2.25E-11 |          |
|                               |                              | 2                       | 0.072861 | 2.96E-11 |          |
| <i>bri1;pSHR-BRI1-GFP 136</i> | 20                           | 7                       | 0.538123 | 1.05E-20 |          |
|                               |                              | 6                       | 0.471105 | 1.35E-18 |          |
|                               |                              | 5                       | 0.354372 | 3.18E-18 |          |
|                               |                              | 4                       | 0.217868 | 2.76E-20 |          |
|                               |                              | 3                       | 0.109288 | 2.13E-20 |          |
|                               |                              | 2                       | 0.066651 | 2.07E-12 |          |

|    |                               |                         |    |          |          |          |
|----|-------------------------------|-------------------------|----|----------|----------|----------|
| 4C | Col-0                         | 36                      | 7  | 0.008044 |          |          |
|    |                               |                         | 6  | 0.007022 |          |          |
|    |                               |                         | 5  | 0.005604 |          |          |
|    |                               |                         |    | 4        | 0.006042 |          |
|    |                               |                         |    | 3        | 0.006537 |          |
|    |                               | <i>bri1</i>             | 17 | 2        | 0.003199 |          |
|    |                               |                         |    | 7        | 0.003375 | 2.43E-18 |
|    |                               |                         |    | 6        | 0.005899 | 4.84E-15 |
|    |                               |                         |    | 5        | 0.005539 | 5.81E-18 |
|    |                               |                         |    | 4        | 0.002851 | 1.54E-22 |
|    |                               |                         |    | 3        | 0.001957 | 5.1E-15  |
|    |                               |                         |    | 2        | 0.001021 | 1.23E-20 |
|    |                               | <i>pBRI1-BRI1-GFPox</i> | 29 | 7        | 0.013235 | 0.346564 |
|    | 6                             |                         |    | 0.010377 | 0.370884 |          |
|    | 5                             |                         |    | 0.00991  | 0.018384 |          |
|    | 4                             |                         |    | 0.009899 | 0.035046 |          |
|    | 3                             |                         |    | 0.007511 | 0.061324 |          |
|    |                               |                         | 2  | 0.002835 | 8.1E-06  |          |
|    | <i>bri1;pRCH1-BRI1-GFP</i>    | 15                      | 7  | 0.010451 | 0.089252 |          |
|    |                               |                         | 6  | 0.015838 | 0.312531 |          |
|    |                               |                         | 5  | 0.007337 | 0.709052 |          |
|    |                               |                         | 4  | 0.007821 | 0.001126 |          |
|    |                               |                         | 3  | 0.00555  | 6.91E-06 |          |
|    |                               |                         | 2  | 0.003937 | 1.15E-06 |          |
|    | <i>bri1;pGL2-BRI1-GFP 17</i>  | 18                      | 7  | 0.008081 | 0.746937 |          |
|    |                               |                         | 6  | 0.006626 | 0.167974 |          |
|    |                               |                         | 5  | 0.007294 | 0.227353 |          |
|    |                               |                         | 4  | 0.007176 | 0.004934 |          |
|    |                               |                         | 3  | 0.005828 | 0.104332 |          |
|    |                               |                         | 2  | 0.002904 | 3.53E-06 |          |
|    | <i>bri1;pGL2-BRI1-GFP 18</i>  | 15                      | 7  | 0.015178 | 0.340103 |          |
|    |                               |                         | 6  | 0.011724 | 0.322768 |          |
|    |                               |                         | 5  | 0.008221 | 0.363632 |          |
|    |                               |                         | 4  | 0.009437 | 0.294321 |          |
|    |                               |                         | 3  | 0.008251 | 0.950186 |          |
|    |                               |                         | 2  | 0.003063 | 3.45E-06 |          |
|    | <i>bri1;pSCR-BRI1-GFP 32</i>  | 24                      | 7  | 0.009265 | 6.07E-05 |          |
|    |                               |                         | 6  | 0.008588 | 1.71E-06 |          |
|    |                               |                         | 5  | 0.010996 | 0.000594 |          |
|    |                               |                         | 4  | 0.00859  | 8.14E-08 |          |
|    |                               |                         | 3  | 0.004525 | 1.79E-09 |          |
|    |                               |                         | 2  | 0.00281  | 2.55E-13 |          |
|    | <i>bri1;pSCR-BRI1-GFP 33</i>  | 21                      | 7  | 0.009586 | 5.11E-10 |          |
|    |                               |                         | 6  | 0.006772 | 9.68E-13 |          |
|    |                               |                         | 5  | 0.005274 | 3.54E-14 |          |
|    |                               |                         | 4  | 0.007798 | 8.7E-11  |          |
|    |                               |                         | 3  | 0.004077 | 4.21E-12 |          |
|    |                               |                         | 2  | 0.002662 | 3.2E-12  |          |
|    | <i>bri1;pSHR-BRI1-GFP 123</i> | 25                      | 7  | 0.005768 | 4.19E-10 |          |
|    |                               |                         | 6  | 0.008983 | 2.63E-06 |          |
|    |                               |                         | 5  | 0.005911 | 7.8E-08  |          |
|    |                               |                         | 4  | 0.00764  | 5.26E-06 |          |
|    |                               |                         | 3  | 0.004887 | 3.55E-05 |          |
|    |                               |                         | 2  | 0.003036 | 5.6E-10  |          |
|    | <i>bri1;pSHR-BRI1-GFP 136</i> | 20                      | 7  | 0.006821 | 3.03E-13 |          |
|    |                               |                         | 6  | 0.006713 | 4.88E-14 |          |
|    |                               |                         | 5  | 0.009348 | 4.21E-09 |          |
|    |                               |                         | 4  | 0.007731 | 7.47E-10 |          |
|    |                               |                         | 3  | 0.00286  | 4.7E-14  |          |
|    |                               |                         | 2  | 0.002777 | 3.95E-11 |          |

---

DAG, days after germination.
