# Supplementary material
Source: PubMed Central journal article supplement (PMC3035089)
Supplement: supp_138.5.839_DEV061804TableS4.pdf [file supp_138.5.839_DEV061804TableS4.pdf]

Table S4. Results of t-test, two-tails, assuming unequal variances

| Figure | Number of plants tested                    | t-test   |
|--------|--------------------------------------------|----------|
| 4D     | Col-0=36/ <i>bri1</i> =25                  | 4.39E-24 |
|        | Col-0=14/ <i>pBRI1-BRI1-GFPox</i> =16      | 0.030922 |
|        | Col-0=15/ <i>bri1;pRCH1-BRI1-GFP</i> =16   | 0.003861 |
|        | Col-0=12/ <i>bri1;pGL2-BRI1-GFP</i> 17=22  | 0.000281 |
|        | Col-0=17/ <i>bri1;pGL2-BRI1-GFP</i> 18=17  | 1.39E-06 |
|        | Col-0=13/ <i>bri1;pSCR-BRI1-GFP</i> 32=17  | 6.18E-07 |
|        | Col-0=19/ <i>bri1;pSCR-BRI1-GFP</i> 33=23  | 2.51E-10 |
|        | Col-0=19/ <i>bri1;pSHR-BRI1-GFP</i> 123=20 | 5.63E-05 |
| 4E     | Col-0=19/ <i>bri1;pSHR-BRI1-GFP</i> 136=22 | 1.15E-05 |
|        | Col-0=36/ <i>bri1</i> =40                  | 8.11E-24 |
|        | Col-0=36/ <i>pBRI1-BRI1-GFPox</i> =37      | 0.76076  |
|        | Col-0=36/ <i>bri1;pRCH1-BRI1-GFP</i> =42   | 1.94E-10 |
|        | Col-0=36/ <i>bri1;pGL2-BRI1-GFP</i> 17=27  | 2.41E-10 |
|        | Col-0=36/ <i>bri1;pGL2-BRI1-GFP</i> 18=12  | 2.62E-09 |
|        | Col-0=36/ <i>bri1;pSCR-BRI1-GFP</i> 32=37  | 1.06E-12 |
|        | Col-0=36/ <i>bri1;pSCR-BRI1-GFP</i> 33=38  | 3.32E-17 |
| 5A     | Col-0=36/ <i>bri1</i> =25                  | 5.42E-13 |
|        | Col-0=14/ <i>pBRI1-BRI1-GFPox</i> =16      | 0.073966 |
|        | Col-0=15/ <i>bri1;pRCH1-BRI1-GFP</i> =16   | 0.009305 |
|        | Col-0=12/ <i>bri1;pGL2-BRI1-GFP</i> 17=22  | 7.78E-05 |
|        | Col-0=17/ <i>bri1;pGL2-BRI1-GFP</i> 18=17  | 5.36E-07 |
|        | Col-0=13/ <i>bri1;pSCR-BRI1-GFP</i> 32=17  | 0.000643 |
|        | Col-0=19/ <i>bri1;pSCR-BRI1-GFP</i> 33=23  | 6.31E-08 |
|        | Col-0=19/ <i>bri1;pSHR-BRI1-GFP</i> 123=20 | 0.037009 |
| 5B     | Col-0=19/ <i>bri1;pSHR-BRI1-GFP</i> 136=22 | 8.03E-05 |
|        | Col-0=36/ <i>bri1</i> =25                  | 1.18E-23 |
|        | Col-0=14/ <i>pBRI1-BRI1-GFPox</i> =16      | 0.104339 |
|        | Col-0=15/ <i>bri1;pRCH1-BRI1-GFP</i> =16   | 0.11719  |
|        | Col-0=12/ <i>bri1;pGL2-BRI1-GFP</i> 17=22  | 0.025236 |
|        | Col-0=17/ <i>bri1;pGL2-BRI1-GFP</i> 18=17  | 0.023864 |
|        | Col-0=13/ <i>bri1;pSCR-BRI1-GFP</i> 32=17  | 7.65E-07 |
|        | Col-0=19/ <i>bri1;pSCR-BRI1-GFP</i> 33=23  | 1.04E-06 |
| 5C     | Col-0=19/ <i>bri1;pSHR-BRI1-GFP</i> 123=20 | 7.96E-05 |
|        | Col-0=19/ <i>bri1;pSHR-BRI1-GFP</i> 136=22 | 0.002123 |
|        | Col-0=36/ <i>bri1</i> =25                  | 0.002943 |
|        | Col-0=14/ <i>pBRI1-BRI1-GFPox</i> =16      | 0.084007 |
|        | Col-0=15/ <i>bri1;pRCH1-BRI1-GFP</i> =16   | 0.036281 |
|        | Col-0=12/ <i>bri1;pGL2-BRI1-GFP</i> 17=22  | 0.000898 |
|        | Col-0=17/ <i>bri1;pGL2-BRI1-GFP</i> 18=17  | 9.4E-06  |
|        | Col-0=13/ <i>bri1;pSCR-BRI1-GFP</i> 32=17  | 0.645125 |
| 5D     | Col-0=19/ <i>bri1;pSCR-BRI1-GFP</i> 33=23  | 0.007254 |
|        | Col-0=19/ <i>bri1;pSHR-BRI1-GFP</i> 123=20 | 0.061102 |
|        | Col-0=19/ <i>bri1;pSHR-BRI1-GFP</i> 136=22 | 0.235191 |
|        | Col-0=36/ <i>bri1</i> =25                  | 6.98E-11 |
|        | Col-0=14/ <i>pBRI1-BRI1-GFPox</i> =16      | 0.098069 |
|        | Col-0=15/ <i>bri1;pRCH1-BRI1-GFP</i> =16   | 0.040429 |
|        | Col-0=12/ <i>bri1;pGL2-BRI1-GFP</i> 17=22  | 0.007176 |
|        | Col-0=17/ <i>bri1;pGL2-BRI1-GFP</i> 18=17  | 0.027624 |
| 5E     | Col-0=13/ <i>bri1;pSCR-BRI1-GFP</i> 32=17  | 0.000631 |
|        | Col-0=19/ <i>bri1;pSCR-BRI1-GFP</i> 33=23  | 0.000875 |
|        | Col-0=19/ <i>bri1;pSHR-BRI1-GFP</i> 123=20 | 0.046256 |
|        | Col-0=19/ <i>bri1;pSHR-BRI1-GFP</i> 136=22 | 0.040313 |
|        | Col-0=36/ <i>bri1</i> =25                  | 2.04E-10 |
|        | Col-0=14/ <i>pBRI1-BRI1-GFPox</i> =16      | 0.893965 |
|        | Col-0=15/ <i>bri1;pRCH1-BRI1-GFP</i> =16   | 0.7502   |
|        | Col-0=12/ <i>bri1;pGL2-BRI1-GFP</i> 17=22  | 0.753904 |
| 5F     | Col-0=17/ <i>bri1;pGL2-BRI1-GFP</i> 18=17  | 0.036688 |
|        | Col-0=13/ <i>bri1;pSCR-BRI1-GFP</i> 32=17  | 5.04E-08 |
|        | Col-0=19/ <i>bri1;pSCR-BRI1-GFP</i> 33=23  | 2.41E-09 |
|        | Col-0=19/ <i>bri1;pSHR-BRI1-GFP</i> 123=20 | 2.33E-08 |
|        | Col-0=19/ <i>bri1;pSHR-BRI1-GFP</i> 136=22 | 0.000475 |
|        | Col-0=36/ <i>bri1</i> =25                  | 3.33E-14 |
|        | Col-0=14/ <i>pBRI1-BRI1-GFPox</i> =16      | 0.597214 |
|        | Col-0=15/ <i>bri1;pRCH1-BRI1-GFP</i> =16   | 0.56786  |
|        | Col-0=12/ <i>bri1;pGL2-BRI1-GFP</i> 17=22  | 0.029347 |
|        | Col-0=17/ <i>bri1;pGL2-BRI1-GFP</i> 18=17  | 0.869909 |
|        | Col-0=13/ <i>bri1;pSCR-BRI1-GFP</i> 32=17  | 0.000394 |
|        | Col-0=19/ <i>bri1;pSCR-BRI1-GFP</i> 33=23  | 0.001038 |
|        | Col-0=19/ <i>bri1;pSHR-BRI1-GFP</i> 123=20 | 8.82E-08 |
|        | Col-0=19/ <i>bri1;pSHR-BRI1-GFP</i> 136=22 | 0.018043 |
