# Supplementary material
Source: PubMed Central journal article supplement (PMC3035089)
Supplement: supp_138.5.839_DEV061804TableS5.pdf [file supp_138.5.839_DEV061804TableS5.pdf]

**Table S5. Results of t-test, two-tails, assuming unequal variances**

| Figure | x-axis variables | Number of plants tested                                                                                                    | t-test   |
|--------|------------------|----------------------------------------------------------------------------------------------------------------------------|----------|
| S1A    | DAG 3            | Col-0=14/ <i>bri1</i> =9                                                                                                   | 2.46E-07 |
|        | DAG 4            | Col-0=13/ <i>bri1</i> =9                                                                                                   | 3.61E-05 |
|        | DAG 5            | Col-0=14/ <i>bri1</i> =9                                                                                                   | 9.9E-12  |
|        | DAG 6            | Col-0=13/ <i>bri1</i> =5                                                                                                   | 0.001288 |
|        | DAG 7            | Col-0=12/ <i>bri1</i> =8                                                                                                   | 2.21E-09 |
| S1B    | meristem         | Col-0=14/ <i>cpd</i> =14                                                                                                   | 0.085869 |
|        | apical meristem  | Col-0=14/ <i>cpd</i> =14                                                                                                   | 0.334204 |
|        | basal meristem   | Col-0=14/ <i>cpd</i> =14                                                                                                   | 1.51E-05 |
| S7     | 0 nM BRZ         | Col-0=18/ <i>bri1</i> ;pGL2- <i>BRI1</i> -GFP=15                                                                           | 0.448176 |
|        |                  | Col-0=18/p <i>BRI1</i> - <i>BRI1</i> -GFPox=28                                                                             | 0.011118 |
|        | 10 nM BRZ        | Col-0=22/ <i>bri1</i> ;pGL2- <i>BRI1</i> -GFP=22                                                                           | 0.599974 |
|        |                  | Col-0=22/p <i>BRI1</i> - <i>BRI1</i> -GFPox=26                                                                             | 0.09937  |
|        | 100 nM BRZ       | Col-0=20/ <i>bri1</i> ;pGL2- <i>BRI1</i> -GFP=26                                                                           | 0.012938 |
|        |                  | Col-0=20/p <i>BRI1</i> - <i>BRI1</i> -GFPox=25                                                                             | 1.85E-05 |
|        | 1000 nM BRZ      | Col-0=15/ <i>bri1</i> ;pGL2- <i>BRI1</i> -GFP=14                                                                           | 0.018217 |
|        |                  | Col-0=15/p <i>BRI1</i> - <i>BRI1</i> -GFPox=17                                                                             | 8.53E-07 |
| S8B    |                  | <i>bri1</i> ;pGL2- <i>BRI1</i> -GFP=11/<br><i>bri1</i> ;pGL2- <i>BRI1</i> -GFP, p <i>SCR</i> - <i>BRI1</i> -GFP=16         | 0.111175 |
|        |                  | <i>bri1</i> ;p <i>SCR</i> - <i>BRI1</i> -GFP=5/<br><i>bri1</i> ;pGL2- <i>BRI1</i> -GFP, p <i>SCR</i> - <i>BRI1</i> -GFP=16 | 1.76E-08 |
|        |                  | <i>bri1</i> ;pGL2- <i>BRI1</i> -GFP=8/<br><i>bri1</i> ;pGL2- <i>BRI1</i> -GFP, p <i>SHR</i> - <i>BRI1</i> -GFP=14          | 0.845848 |
| S8D    |                  | <i>bri1</i> ;p <i>SHR</i> - <i>BRI1</i> -GFP=6/<br><i>bri1</i> ;pGL2- <i>BRI1</i> -GFP, p <i>SHR</i> - <i>BRI1</i> -GFP=14 | 4.24E-10 |

DAG, days after germination.
